# Supplementary material for: Explaining regional variation in elective hip and knee arthroplasties in Finland 2010 − 2017—a register-based cohort study
Source: PubMed Central journal article supplement (PMC9270793; doi:10.1186/s12913-022-08305-7), 2022-07-09

**THA, Model 4: 2010–2013**

**THA, Model 5: 2010–2013**

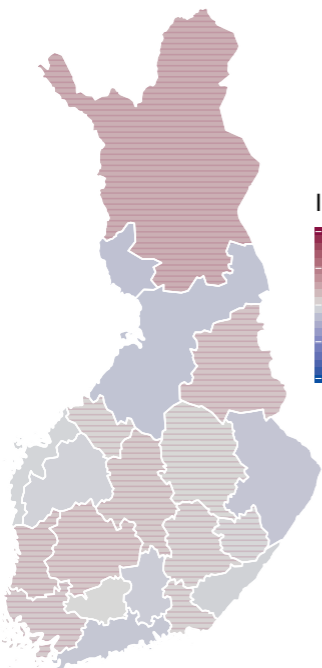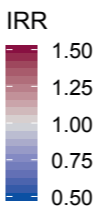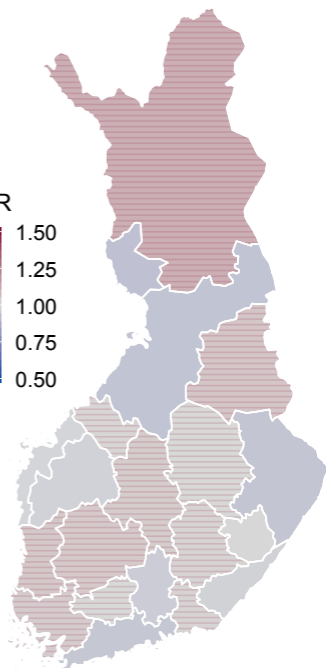

**THA, Model 4: 2014–2017**

**THA, Model 5: 2014–2017**

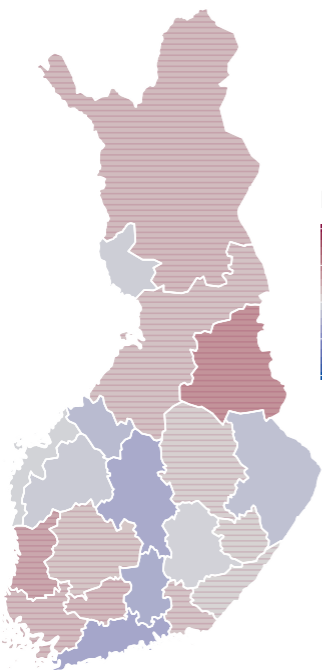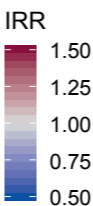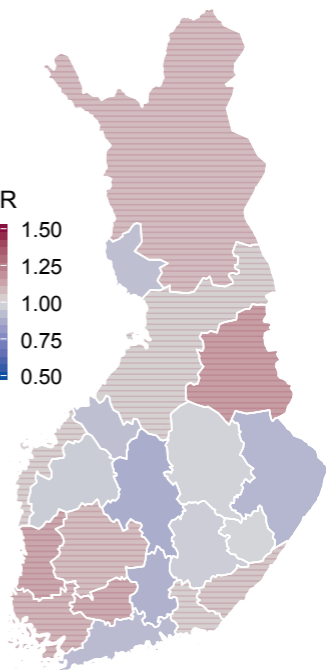

Supplement: 12913_2022_8305_MOESM4_ESM.pdf [file 12913_2022_8305_MOESM4_ESM.pdf]
