# Supplementary material for: Explaining regional variation in elective hip and knee arthroplasties in Finland 2010 − 2017—a register-based cohort study
Source: Springer Nature journal article supplement (doi:10.1186/s12913-022-08305-7), 2022-07-09

TKA, Model 4: 2010–2013

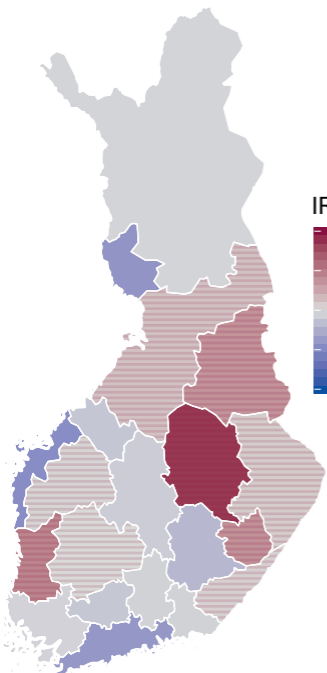

TKA, Model 5: 2010–2013

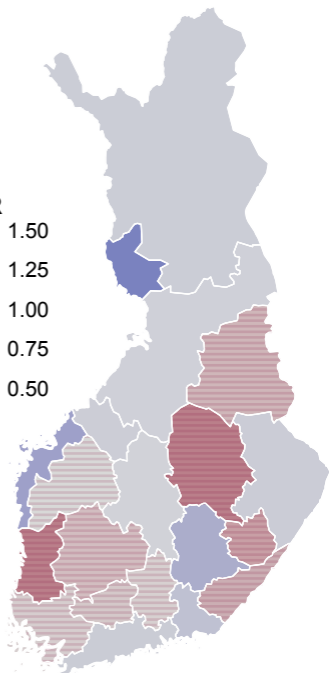

TKA, Model 4: 2014–2017

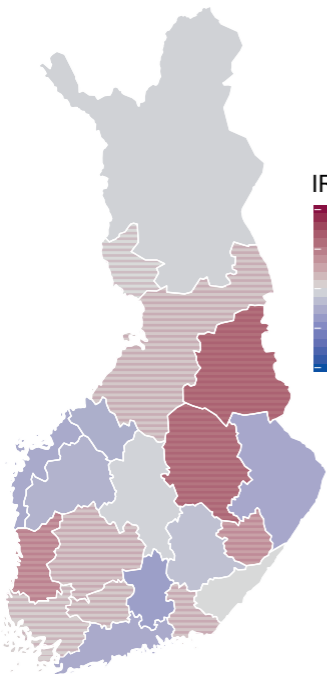

TKA, Model 5: 2014–2017

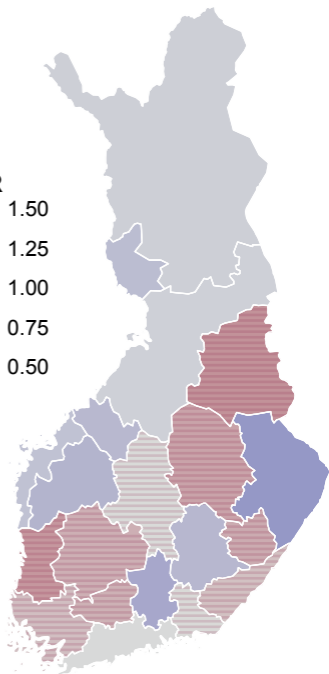

Supplement: MOESM5 [file 23253494]
